# Supplementary material for: Two-dimensional Weyl semi-half-metallic NiCS3 with a band structure controllable by the direction of magnetization
Source: Royal Society of Chemistry journal article supplement (doi:10.1039/d1cp00812a), 2021-01-01
Supplement: d1cp00812a1.pdf [file d1cp00812a1.pdf]

## Supplementary Information

### Two-dimensional Weyl Semi-half-metallic NiCS<sub>3</sub> with band structure controllable by direction of magnetization

Gui-Gui Li, Rong-rong Xie, Li-Juan Ding, Wei-Xiao Ji\*, Sheng-Shi Li, Chang-Wen Zhang, Ping Li, and Pei-Ji Wang\*

Spintronics Institute & School of Physics and Technology, University of Jinan, Jinan, Shandong, 250022, People's Republic of China

Corresponding Author. E-mail: hellojiweixiao@163.com

Corresponding Author. E-mail: ss\_wangpj@ujn.edu.cn

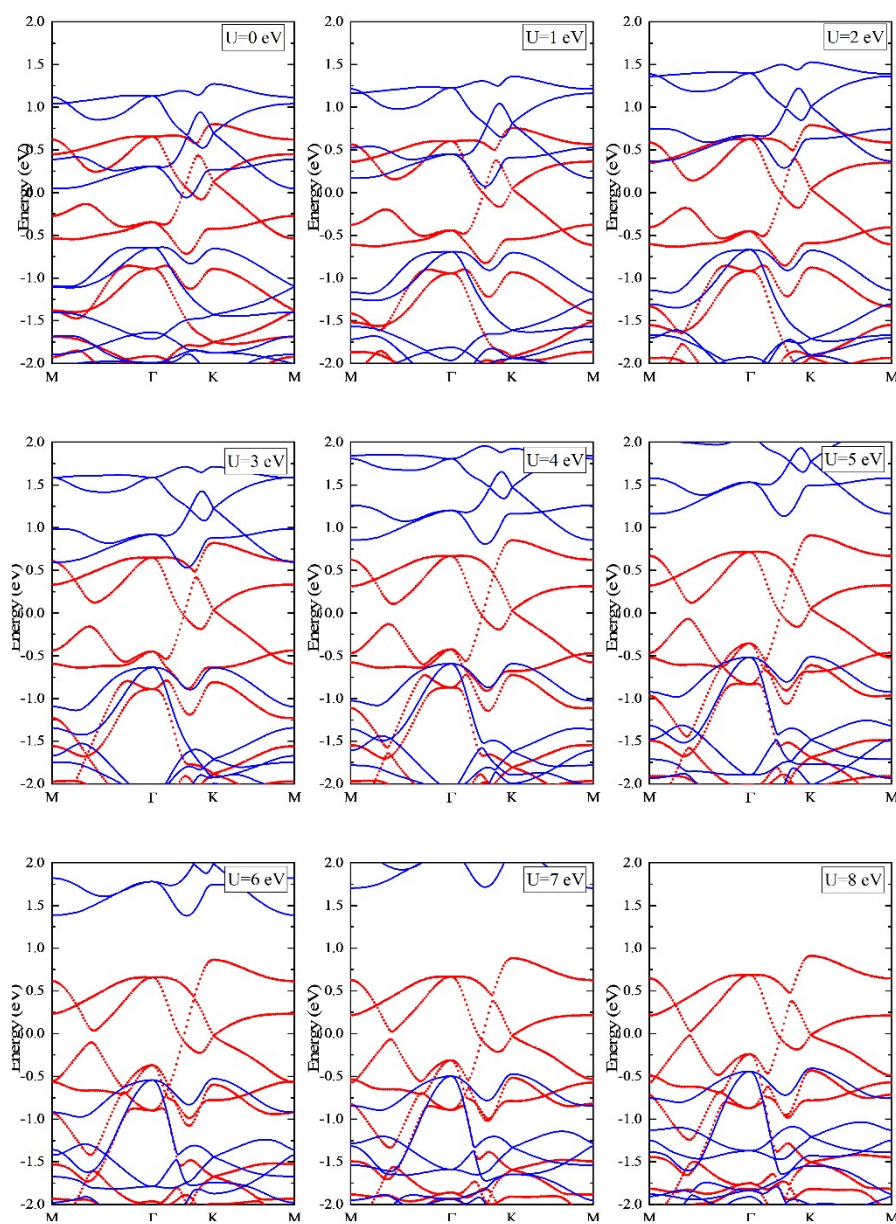

Figure S1. The band structures of NiCS<sub>3</sub> calculated at PBE+U level, with different value of U.

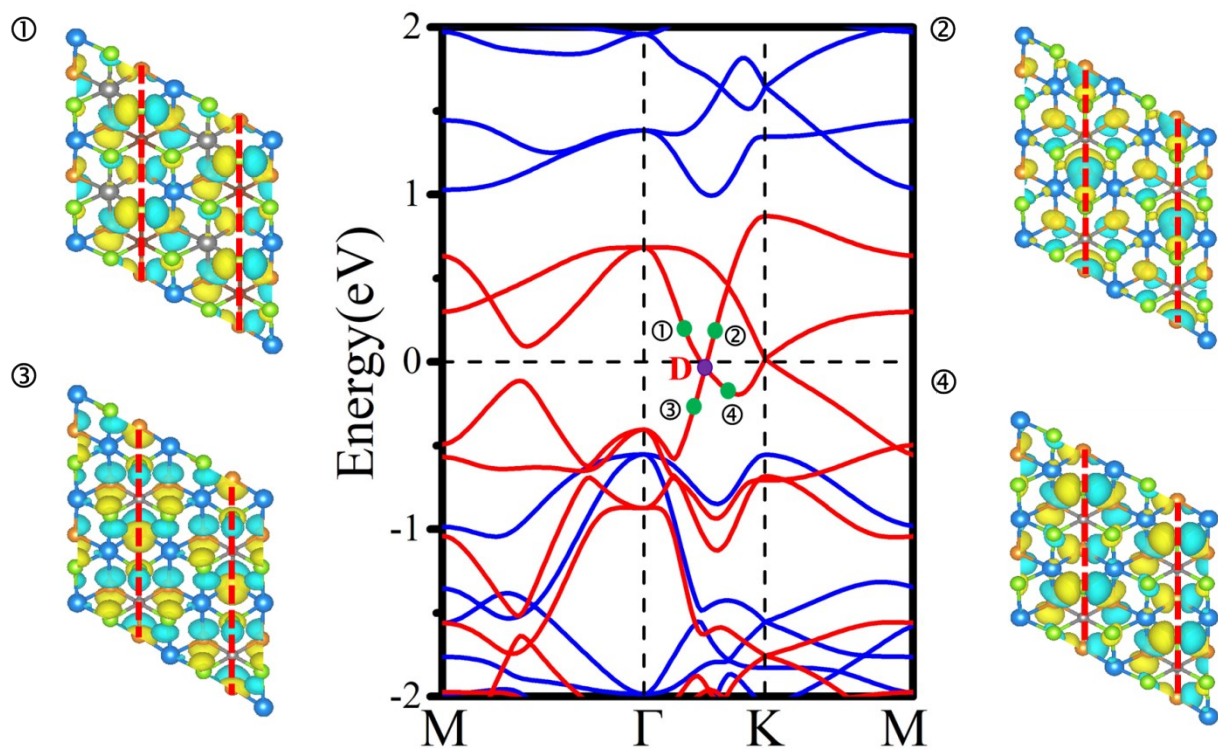

Figure S2. The real space Kohn-Sham wave function in the spin-up channel near the crossing point D.

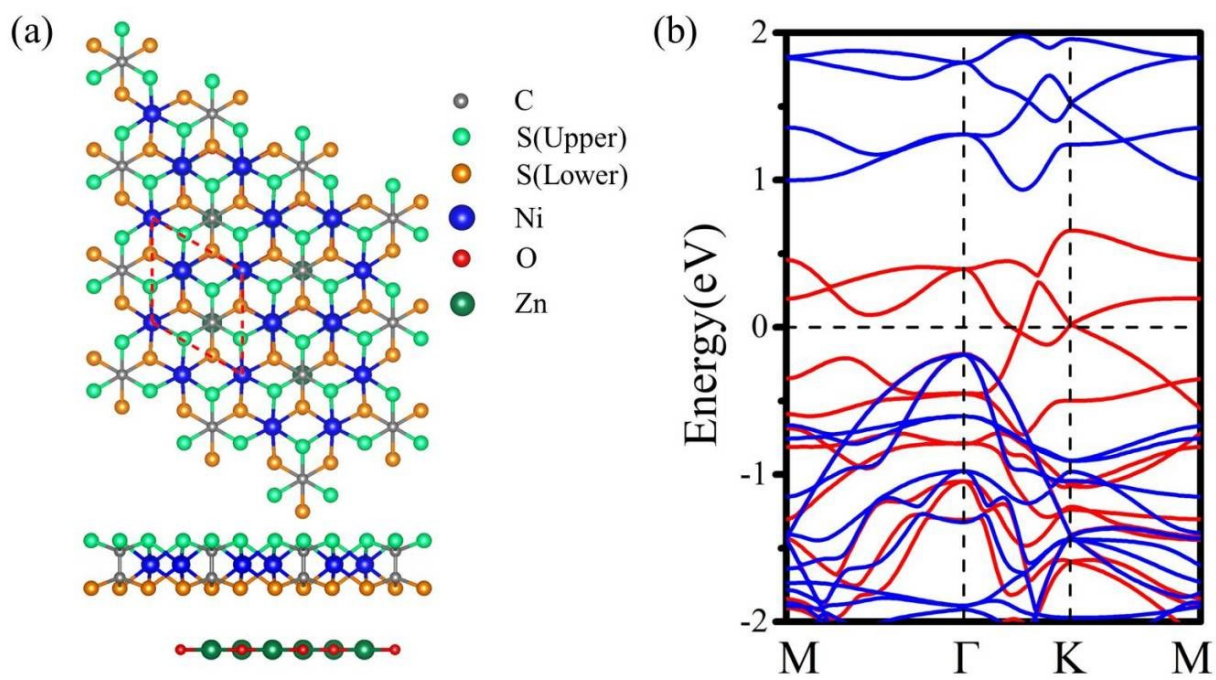

Figure S3. (a) The configuration and (b) band structure of NiCS<sub>3</sub> on top of 2D ZnO film.
